# Supplementary material for: Permafrost Nitrous Oxide Emissions Observed on a Landscape Scale Using Airborne Eddy Covariance Method
Source: Copernicus journal article supplement (doi:10.5194/acp-2018-1108), 2018-10-19
Supplement: Supplementary file 1 [file acp-2018-1108-supplement.pdf]

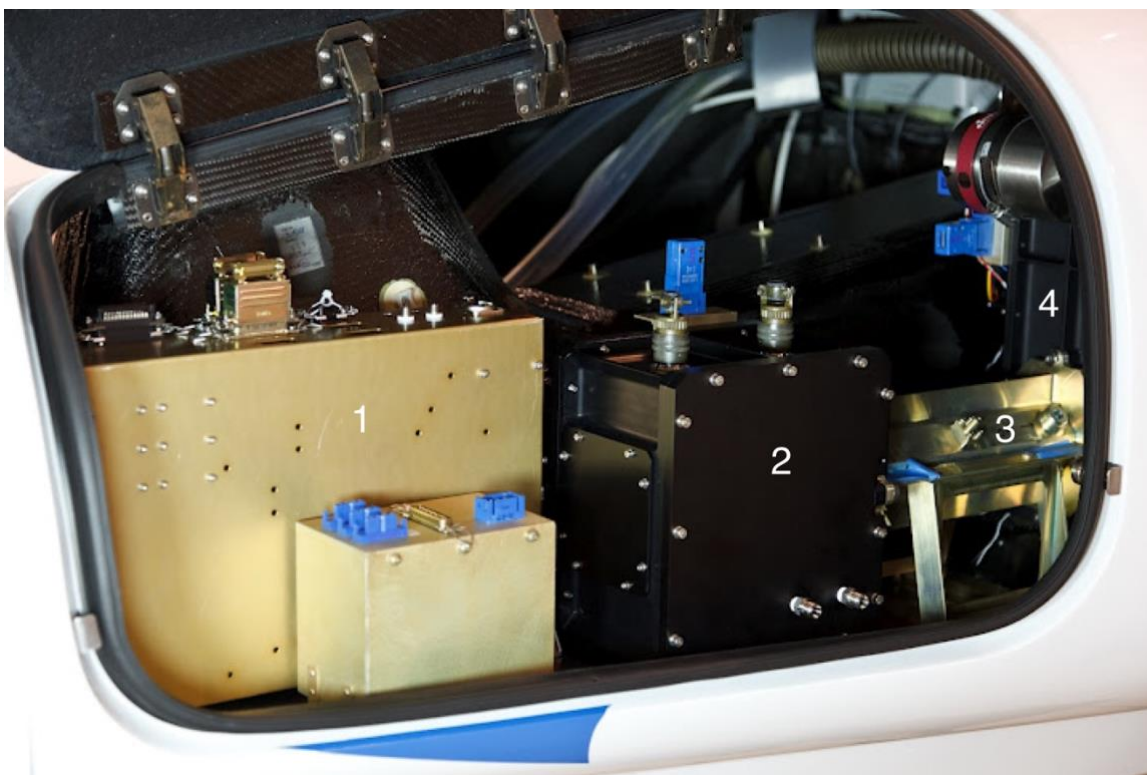

15 **Figure S1.** Image of N<sub>2</sub>O/CH<sub>4</sub>/H<sub>2</sub>O instrument in aircraft's luggage bay, which shows 1) electronics board, 2) detector pressure vessel, 3) detection cell, and 4) laser pressure vessel. Electronic cables were removed for clarity.

20

25

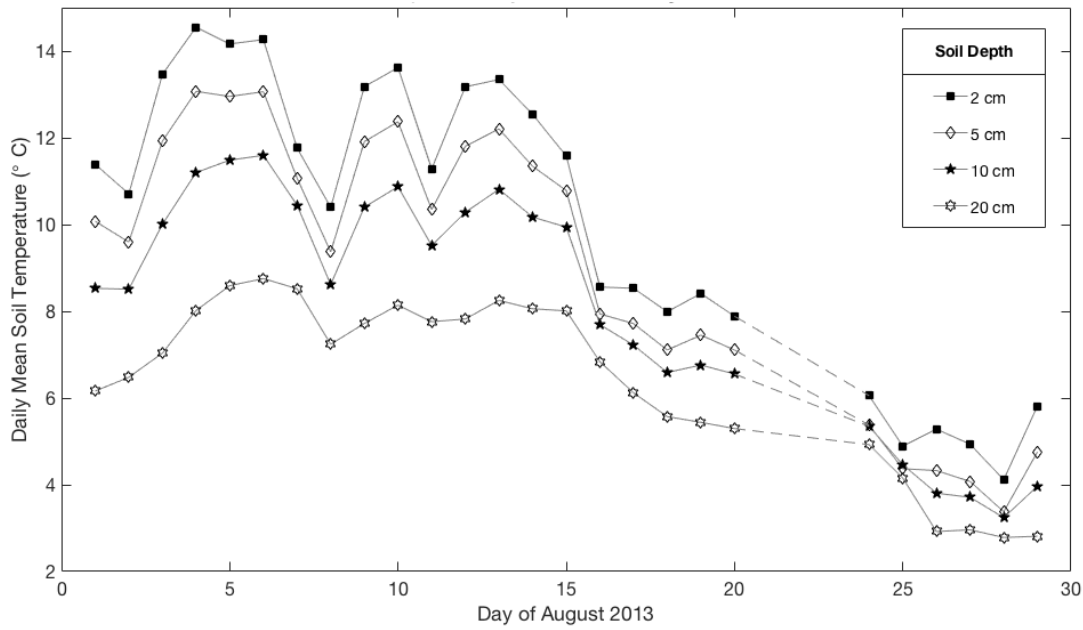

**Figure S2.** Daily mean soil temperatures at 2, 5, 10, and 20 cm depths. Each temperature shown is based on averaging 3 temperature probe sites located in the vicinity of the flux tower and then averaged for the full day. August 21-23 are missing because the flux tower platform was not being operated at that time.

5

10

15

20

25

- 5 **Table S1. In-flight precision and observed flux averages with 99% CI range.** Second column lists flight-by-flight precision from in-flight calibration data. Spatially averaged fluxes are presented with bootstrap-derived 99% confidence intervals in parentheses.

| Flight date<br>DD.HH | $\sigma_{\text{N}_2\text{O}}$ (ppb Hz <sup>-1/2</sup> ) | Mean N <sub>2</sub> O flux<br>( $\mu\text{g N}_2\text{O m}^{-2} \text{ s}^{-1}$ ) |
|----------------------|---------------------------------------------------------|-----------------------------------------------------------------------------------|
| 25.18                | 0.30                                                    | 0.05 (0.016, 0.097)                                                               |
| 27.11                | 0.53                                                    | -0.01 (-0.053, 0.045)                                                             |
| 27.19                | 0.58                                                    | 0.015 (-0.003, 0.040)                                                             |
| 28.10                | 0.27                                                    | 0.10 (0.049, 0.160)                                                               |
| 28.15                | 0.44                                                    | 0.04 (-0.002, 0.103)                                                              |
| All flights          |                                                         | 0.043 (0.017, 0.063)                                                              |
